# Supplementary material
Source: MDPI journal article supplement (https://www.mdpi.com/2072-4292/14/3/690)
Supplement: s1 [file s1]

Supplementary Material for

## **Monitoring post-flood recovery of croplands using Sentinel-1/2 imagery**

Miao Li <sup>1</sup>, Tao Zhang <sup>1,2</sup>, Ying Tu <sup>1</sup>, Zhehao Ren <sup>1</sup> and Bing Xu <sup>1,2,\*</sup>

1 Department of Earth System Science, Ministry of Education Key Laboratory for Earth System Modeling, Institute for Global Change Studies, Tsinghua University, Beijing 100084, China; lim20@mails.tsinghua.edu.cn (M.L.); jessezhang@mail.tsinghua.edu.cn (T.Z.); tuy19@mails.tsinghua.edu.cn (Y.T.); rzh18@mails.tsinghua.edu.cn

2 Ministry of Education Ecological Field Station for East Asian Migratory Birds, Beijing 100084, China.

\* Correspondence: bingxu@tsinghua.edu.cn

## **Table of Contents**

Tables S1-4

Figure S1-2

## Tables S1

**Table S1.** The acquisition date and identifier information of the employed Sentinel-1 IW datasets for flood extent extraction.

| Study region | Acquisition date | Identifier information                                              |
|--------------|------------------|---------------------------------------------------------------------|
| Huai River   | 2020/07/27       | S1A_IW_GRDH_1SDV_20200727T101147_20200727T101212_033639_03E612_8FD4 |
|              |                  | S1A_IW_GRDH_1SDV_20200727T101212_20200727T101237_033639_03E612_2DD2 |
| Huai River   | 2020/08/01       | S1A_IW_GRDH_1SDV_20200801T101941_20200801T102006_033712_03E840_44A3 |
|              |                  | S1A_IW_GRDH_1SDV_20200801T102006_20200801T102031_033712_03E840_D694 |
| Chao Lake    | 2020/07/27       | S1A_IW_GRDH_1SDV_20200727T101122_20200727T101147_033639_03E612_6A3E |
|              |                  | S1A_IW_GRDH_1SDV_20200727T101147_20200727T101212_033639_03E612_8FD4 |
| Chao Lake    | 2020/08/08       | S1A_IW_GRDH_1SDV_20200808T101123_20200808T101148_033814_03EB9C_0FCE |
|              |                  | S1A_IW_GRDH_1SDV_20200808T101148_20200808T101213_033814_03EB9C_F9E3 |
| Poyang Lake  | 2020/7/8         | S1A_IW_GRDH_1SDV_20200708T101849_20200708T101914_033362_03DD85_5B9E |
|              |                  | S1A_IW_GRDH_1SDV_20200708T101914_20200708T101939_033362_03DD85_0B97 |
| Poyang Lake  | 2020/7/14        | S1B_IW_GRDH_1SDV_20200714T101817_20200714T101852_022466_02AA36_A270 |
|              |                  | S1A_IW_GRDH_1SDV_20200715T101031_20200715T101056_033464_03E0B4_DDA1 |
| Poyang Lake  | 2020/7/15        | S1A_IW_GRDH_1SDV_20200715T101056_20200715T101121_033464_03E0B4_42CD |

**Table S2.** Water areas within croplands extracted by different thresholds and sieving values between the normal year (2019) and the flood year (2020).

| Threshold<br>(dB) | Removed patches<br>(Connectivity) | Chao Lake Region     |                      |                                           | Poyang Lake Region   |                      |                                           | Huai River Region    |                      |                                           |
|-------------------|-----------------------------------|----------------------|----------------------|-------------------------------------------|----------------------|----------------------|-------------------------------------------|----------------------|----------------------|-------------------------------------------|
|                   |                                   | Water area<br>(2020) | Water area<br>(2019) | $\frac{Area_{20} - Area_{19}}{Area_{20}}$ | Water area<br>(2020) | Water area<br>(2019) | $\frac{Area_{20} - Area_{19}}{Area_{20}}$ | Water area<br>(2020) | Water area<br>(2019) | $\frac{Area_{20} - Area_{19}}{Area_{20}}$ |
| <b>-16.5</b>      | 2                                 | 489                  | 76                   | 84.5%                                     | 1016                 | 402                  | 60.4%                                     | 1221                 | 462                  | 62.2%                                     |
|                   | 50                                | 405                  | 17                   | 95.8%                                     | 822                  | 271                  | 67.0%                                     | 1011                 | 218                  | 78.4%                                     |
|                   | <b>100</b>                        | 379                  | 8                    | <b>97.9%</b>                              | 750                  | 229                  | <b>69.5%</b>                              | 962                  | 163                  | <b>83.1%</b>                              |
| -16               | 2                                 | 531                  | 108                  | 79.7%                                     | 1093                 | 450                  | 58.8%                                     | 1371                 | 671                  | 51.1%                                     |
|                   | 50                                | 433                  | 30                   | 93.1%                                     | 880                  | 301                  | 65.8%                                     | 1098                 | 349                  | 68.2%                                     |
|                   | 100                               | 402                  | 15                   | 96.3%                                     | 806                  | 255                  | 68.4%                                     | 1028                 | 268                  | 73.9%                                     |
| -15.5             | 2                                 | 582                  | 150                  | 74.2%                                     | 1176                 | 508                  | 56.8%                                     | 1569                 | 951                  | 39.4%                                     |
|                   | 50                                | 466                  | 51                   | 89.1%                                     | 946                  | 337                  | 64.4%                                     | 1229                 | 545                  | 55.7%                                     |
|                   | 100                               | 430                  | 28                   | 93.5%                                     | 863                  | 286                  | 66.9%                                     | 1131                 | 426                  | 62.3%                                     |
| -15               | 2                                 | 644                  | 206                  | 68.0%                                     | 1269                 | 580                  | 54.3%                                     | 1821                 | 1314                 | 27.8%                                     |
|                   | 50                                | 510                  | 83                   | 83.7%                                     | 1017                 | 380                  | 62.6%                                     | 1421                 | 830                  | 41.6%                                     |
|                   | 100                               | 466                  | 48                   | 89.7%                                     | 929                  | 320                  | 65.6%                                     | 1293                 | 671                  | 48.1%                                     |
| -14.5             | 2                                 | 719                  | 279                  | 61.2%                                     | 1373                 | 671                  | 51.1%                                     | 2137                 | 1769                 | 17.2%                                     |
|                   | 50                                | 567                  | 130                  | 77.1%                                     | 1096                 | 435                  | 60.3%                                     | 1693                 | 1229                 | 27.4%                                     |
|                   | 100                               | 514                  | 84                   | 83.7%                                     | 1000                 | 366                  | 63.4%                                     | 1527                 | 1028                 | 32.7%                                     |
| -14               | 2                                 | 809                  | 374                  | 53.8%                                     | 1496                 | 788                  | 47.3%                                     | 2521                 | 2315                 | 8.2%                                      |
|                   | 50                                | 640                  | 198                  | 69.1%                                     | 1190                 | 503                  | 57.7%                                     | 2048                 | 1743                 | 14.9%                                     |
|                   | 100                               | 580                  | 138                  | 76.2%                                     | 1082                 | 428                  | 60.4%                                     | 1864                 | 1522                 | 18.3%                                     |

**Table S3.** Statistics of the flood-affected croplands and recovery conditions in the three study areas.

| (A) Study area near the Huai River    | CI (2016-2018)          |                              | Disaster area (2020)    |                                             |                                   |                      |                                   |                      |                                   |                      |
|---------------------------------------|-------------------------|------------------------------|-------------------------|---------------------------------------------|-----------------------------------|----------------------|-----------------------------------|----------------------|-----------------------------------|----------------------|
|                                       | Area (km <sup>2</sup> ) | Proportion in the study area | Area (km <sup>2</sup> ) | Proportion in the specific cropping pattern | October                           |                      | November                          |                      | December                          |                      |
|                                       |                         |                              |                         |                                             | Recovered area (km <sup>2</sup> ) | Recovered proportion | Recovered area (km <sup>2</sup> ) | Recovered proportion | Recovered area (km <sup>2</sup> ) | Recovered proportion |
| Single cropping                       | 5705                    | 24.24%                       | 238                     | 4.17%                                       | 71.5                              | 30.04%               | 96.9                              | 40.71%               | 111.8                             | 46.97%               |
| Double cropping                       | 11020                   | 46.82%                       | 720                     | 6.53%                                       | 319.6                             | 44.39%               | 514.6                             | 71.47%               | 582.1                             | 80.85%               |
| Total                                 | 16842                   | 71.56%                       | 958                     | 5.69%                                       | 391.1                             | 40.82%               | 611.5                             | 63.83%               | 693.9                             | 72.43%               |
| (B) Study area around the Poyang Lake | CI (2016-2018)          |                              | Disaster area (2020)    |                                             |                                   |                      |                                   |                      |                                   |                      |
|                                       | Area (km <sup>2</sup> ) | Proportion in the study area | Area (km <sup>2</sup> ) | Proportion in the specific cropping pattern | October                           |                      | November                          |                      | December                          |                      |
|                                       |                         |                              |                         |                                             | Recovered area (km <sup>2</sup> ) | Recovered proportion | Recovered area (km <sup>2</sup> ) | Recovered proportion | Recovered area (km <sup>2</sup> ) | Recovered proportion |
| Single cropping                       | 6878                    | 24.45%                       | 580                     | 8.43%                                       | 346.7                             | 59.78%               | 370.1                             | 63.81%               | 414.1                             | 71.40%               |
| Double cropping                       | 3446                    | 12.25%                       | 169                     | 4.90%                                       | 83.7                              | 49.53%               | 94.9                              | 56.15%               | 112.9                             | 66.80%               |
| Total                                 | 10345                   | 36.78%                       | 749                     | 7.24%                                       | 430.4                             | 57.46%               | 465                               | 62.08%               | 527                               | 70.36%               |
| (C) Study area around the Chao Lake   | CI (2016-2018)          |                              | Disaster area (2020)    |                                             |                                   |                      |                                   |                      |                                   |                      |
|                                       | Area (km <sup>2</sup> ) | Proportion in the study area | Area (km <sup>2</sup> ) | Proportion in the specific cropping pattern | October                           |                      | November                          |                      | December                          |                      |
|                                       |                         |                              |                         |                                             | Recovered area (km <sup>2</sup> ) | Recovered proportion | Recovered area (km <sup>2</sup> ) | Recovered proportion | Recovered area (km <sup>2</sup> ) | Recovered proportion |
| Single cropping                       | 2651                    | 36.99%                       | 190                     | 7.17%                                       | 29.5                              | 15.53%               | 44.1                              | 23.21%               | 57.9                              | 30.47%               |
| Double cropping                       | 1848                    | 25.78%                       | 189                     | 10.23%                                      | 34.3                              | 18.15%               | 46.7                              | 24.71%               | 65.3                              | 34.55%               |
| Total                                 | 4504                    | 62.84%                       | 379                     | 8.41%                                       | 63.8                              | 16.83%               | 90.8                              | 23.96%               | 123.2                             | 32.51%               |

**Table S4.** Active arrangements summarized in reference to the official announcements.

| <b>Flood-stricken paddy types</b> | <b>Planting period</b>                | <b>Flood duration</b> | <b>Active arrangements (after draining, fertilizing, and spraying insecticide)</b>                             |
|-----------------------------------|---------------------------------------|-----------------------|----------------------------------------------------------------------------------------------------------------|
| Double-cropped early rice         | Harvest period                        | Short                 | Rush harvesting and planting double-season cropland                                                            |
|                                   |                                       | Long                  | Replace double-season late rice with early rice varieties; replant dry crops (i.e., corns); replant vegetables |
| Single-cropped rice               | Late tillering stage or booting stage | Short                 | Recover the growth of single-season rice                                                                       |
|                                   |                                       | Long                  | Apply ratooning rice technologies; replant dry crops; replant vegetables                                       |
| Double-cropped late rice          | Seeding stage                         | Short                 | Wash seedings and transplanting timely                                                                         |

**Figure S1**

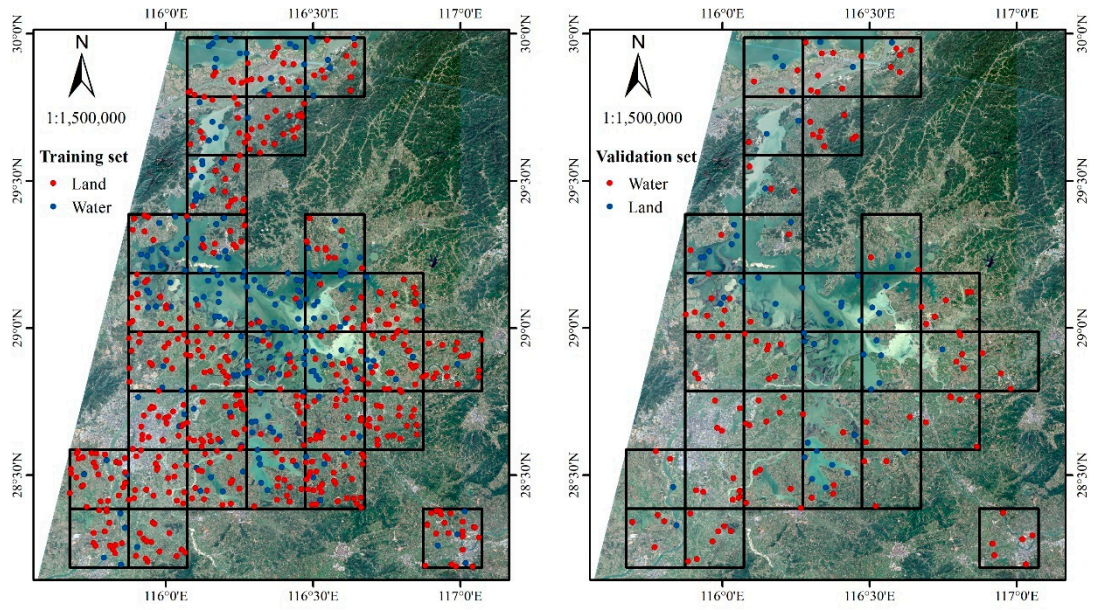

**Figure S1.** Spatial distribution of visually interpreted training and test samples for water extraction method comparison.

Figure S2

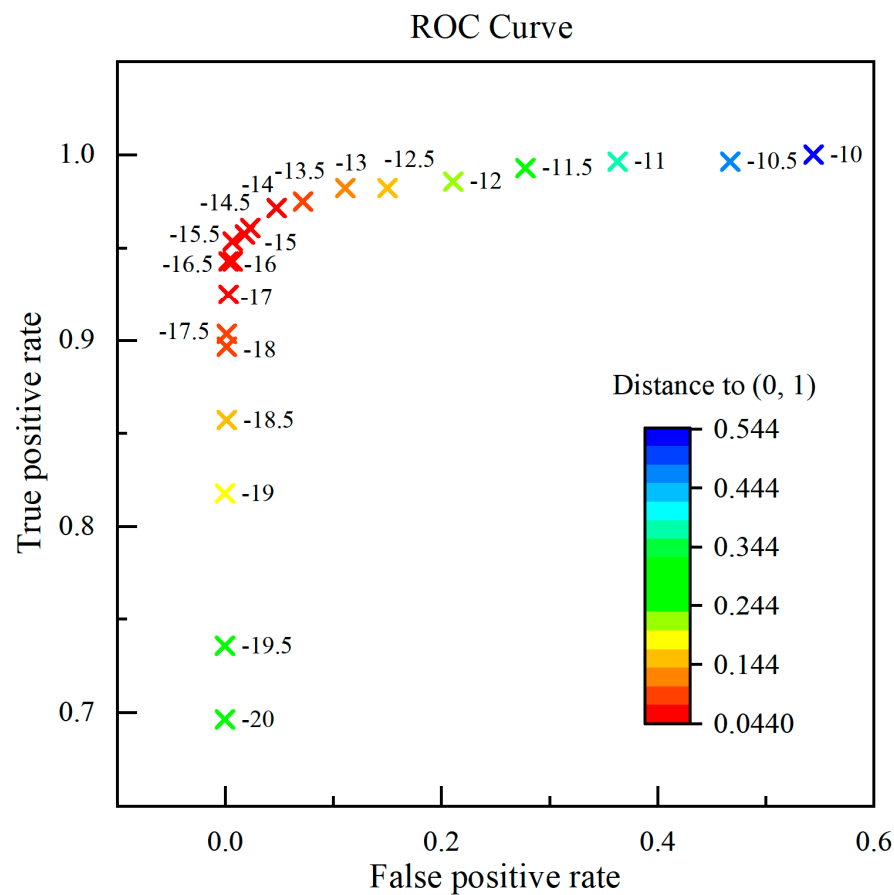

**Figure S2.** Receiver operating characteristic (ROC) curve for water extraction threshold selection. The ROC curve was calculated over the dataset of 892 validation points.
